# Supplementary material for: Distinctions and associations between the microbiota of saliva and supragingival plaque of permanent and deciduous teeth
Source: PubMed Central journal article supplement (PMC6034885; doi:10.1371/journal.pone.0200337), 2018-07-06
Supplement: pone.0200337.s003.pdf [file pone.0200337.s003.pdf]

**S2 Table.**

| Alpha diversity index | Group   | Spearman correlation |         |
|-----------------------|---------|----------------------|---------|
|                       |         | $r_s$                | $P$     |
| Observed OTUs         | PT - S  | 0.513                | 0.021   |
|                       | DT - S  | 0.723                | < 0.001 |
|                       | PT - DT | 0.789                | < 0.001 |
| Equitability          | PT - S  | 0.400                | 0.081   |
|                       | DT - S  | 0.626                | 0.003   |
|                       | PT - DT | 0.568                | 0.009   |
| Shannon               | PT - S  | 0.481                | 0.032   |
|                       | DT - S  | 0.574                | 0.008   |
|                       | PT - DT | 0.680                | 0.001   |
