# Supplementary material for: Distinctions and associations between the microbiota of saliva and supragingival plaque of permanent and deciduous teeth
Source: PubMed Central journal article supplement (PMC6034885; doi:10.1371/journal.pone.0200337), 2018-07-06
Supplement: pone.0200337.s004.pdf [file pone.0200337.s004.pdf]

**S3 Table.**

|                                                                                                                                       | <b>PT vs. S</b>                                                                                                                                                                                                                              | <b>DT vs. S</b>                                                                                                                                                                                                                                                                                          |
|---------------------------------------------------------------------------------------------------------------------------------------|----------------------------------------------------------------------------------------------------------------------------------------------------------------------------------------------------------------------------------------------|----------------------------------------------------------------------------------------------------------------------------------------------------------------------------------------------------------------------------------------------------------------------------------------------------------|
| <b>Genera enriched in plaque*</b><br>(Genera with a significantly higher abundance in PT or DT groups than in the S group)            | <i>Fusobacterium,</i><br><i>Capnocytophaga,</i><br><i>Actinomyces,</i><br><i>Leptotrichia,</i><br><i>Corynebacterium,</i><br><i>Aggregatibacter,</i><br><i>Campylobacter,</i><br><i>Tannerella,</i><br><i>Gemella,</i><br><i>Selenomonas</i> | <i>Fusobacterium,</i><br><i>Capnocytophaga,</i><br><i>Lautropia,</i><br><i>Corynebacterium,</i><br><i>Aggregatibacter,</i><br><i>Campylobacter,</i><br><i>Tannerella,</i><br><i>Eikenella,</i><br><i>Paludibacter,</i><br><i>Kingella,</i><br><i>Gemella,</i><br><i>Selenomonas,</i><br><i>Treponema</i> |
| <b>Genera enriched in saliva*</b><br>(Genera with a significantly higher abundance in the S group than in either the PT or DT groups) | <i>Streptococcus,</i><br><i>Haemophilus,</i><br><i>Granulicatella,</i><br><i>Rothia,</i><br><i>[Prevotella],</i><br><i>Oribacterium,</i><br><i>Bulleidia</i>                                                                                 | <i>Streptococcus,</i><br><i>Granulicatella,</i><br><i>Rothia,</i><br><i>[Prevotella],</i><br><i>Veillonella,</i><br><i>Oribacterium,</i><br><i>Bulleidia,</i><br><i>Moryella</i>                                                                                                                         |
