# Supplementary material for: Distinctions and associations between the microbiota of saliva and supragingival plaque of permanent and deciduous teeth
Source: PubMed Central journal article supplement (PMC6034885; doi:10.1371/journal.pone.0200337), 2018-07-06
Supplement: pone.0200337.s005.pdf [file pone.0200337.s005.pdf]

**S4 Table**

| <b>Groups</b> | <b>Genera</b>             | <b><math>r_s</math></b> | <b><math>P</math></b> |
|---------------|---------------------------|-------------------------|-----------------------|
| PT - S        | <i>[Prevotella]</i>       | 0.232                   | 0.326                 |
| PT - S        | <i>Abiotrophia</i>        | 0.531                   | 0.016                 |
| PT - S        | <i>Acidithiobacillus</i>  | -0.016                  | 0.948                 |
| PT - S        | <i>Actinobacillus</i>     | 0.192                   | 0.417                 |
| PT - S        | <i>Actinomyces</i>        | 0.792                   | 0.000                 |
| PT - S        | <i>Aggregatibacter</i>    | 0.220                   | 0.352                 |
| PT - S        | <i>Anaerovorax</i>        | 0.530                   | 0.016                 |
| PT - S        | <i>Atopobium</i>          | 0.206                   | 0.384                 |
| PT - S        | <i>Bacillus</i>           | -0.111                  | 0.642                 |
| PT - S        | <i>Bulleidia</i>          | -0.179                  | 0.451                 |
| PT - S        | <i>Butyrivibrio</i>       | 0.047                   | 0.843                 |
| PT - S        | <i>Campylobacter</i>      | 0.290                   | 0.214                 |
| PT - S        | <i>Capnocytophaga</i>     | 0.761                   | 0.000                 |
| PT - S        | <i>Cardiobacterium</i>    | 0.483                   | 0.031                 |
| PT - S        | <i>Catonella</i>          | 0.484                   | 0.031                 |
| PT - S        | <i>Corynebacterium</i>    | 0.783                   | 0.000                 |
| PT - S        | <i>Dialister</i>          | 0.424                   | 0.062                 |
| PT - S        | <i>Eikenella</i>          | 0.438                   | 0.054                 |
| PT - S        | <i>Enterococcus</i>       | 0.192                   | 0.417                 |
| PT - S        | <i>Filifactor</i>         | -0.180                  | 0.449                 |
| PT - S        | <i>Fusobacterium</i>      | 0.722                   | 0.000                 |
| PT - S        | <i>Gemella</i>            | 0.586                   | 0.007                 |
| PT - S        | <i>Granulicatella</i>     | 0.371                   | 0.107                 |
| PT - S        | <i>Haemophilus</i>        | 0.006                   | 0.980                 |
| PT - S        | <i>Kingella</i>           | 0.705                   | 0.001                 |
| PT - S        | <i>Lautropia</i>          | 0.629                   | 0.003                 |
| PT - S        | <i>Leptotrichia</i>       | 0.254                   | 0.280                 |
| PT - S        | <i>Megasphaera</i>        | 0.507                   | 0.022                 |
| PT - S        | <i>Mogibacterium</i>      | -0.159                  | 0.504                 |
| PT - S        | <i>Moraxella</i>          | 0.720                   | 0.000                 |
| PT - S        | <i>Moryella</i>           | 0.238                   | 0.313                 |
| PT - S        | <i>Mycoplasma</i>         | 0.745                   | 0.000                 |
| PT - S        | <i>Neisseria</i>          | 0.639                   | 0.002                 |
| PT - S        | <i>Oribacterium</i>       | 0.150                   | 0.527                 |
| PT - S        | <i>Paludibacter</i>       | 0.614                   | 0.004                 |
| PT - S        | <i>Parvimonas</i>         | 0.377                   | 0.102                 |
| PT - S        | <i>Peptococcus</i>        | 0.421                   | 0.065                 |
| PT - S        | <i>Peptostreptococcus</i> | 0.542                   | 0.013                 |
| PT - S        | <i>Porphyromonas</i>      | 0.048                   | 0.840                 |
| PT - S        | <i>Prevotella</i>         | 0.588                   | 0.006                 |
| PT - S        | <i>Propionivibrio</i>     | 0.435                   | 0.055                 |
| PT - S        | <i>Rothia</i>             | 0.208                   | 0.380                 |
| PT - S        | <i>Schwartzia</i>         | 0.392                   | 0.087                 |
| PT - S        | <i>Selenomonas</i>        | 0.763                   | 0.000                 |
| PT - S        | <i>Staphylococcus</i>     | -0.096                  | 0.687                 |
| PT - S        | <i>Streptococcus</i>      | 0.532                   | 0.016                 |

|        |                           |        |       |
|--------|---------------------------|--------|-------|
| PT - S | <i>Tannerella</i>         | 0.314  | 0.177 |
| PT - S | <i>TG5</i>                | 0.299  | 0.200 |
| PT - S | <i>Treponema</i>          | 0.697  | 0.001 |
| PT - S | <i>Veillonella</i>        | 0.505  | 0.023 |
| <hr/>  |                           |        |       |
| DT - S | <i>[Prevotella]</i>       | 0.116  | 0.627 |
| DT - S | <i>Abiotrophia</i>        | 0.681  | 0.001 |
| DT - S | <i>Acidithiobacillus</i>  | -0.365 | 0.113 |
| DT - S | <i>Actinobacillus</i>     | 0.149  | 0.530 |
| DT - S | <i>Actinomyces</i>        | 0.346  | 0.135 |
| DT - S | <i>Aggregatibacter</i>    | 0.248  | 0.292 |
| DT - S | <i>Anaerovorax</i>        | 0.390  | 0.089 |
| DT - S | <i>Atopobium</i>          | 0.212  | 0.370 |
| DT - S | <i>Blvii28</i>            | 0.725  | 0.000 |
| DT - S | <i>Bulleidia</i>          | 0.212  | 0.369 |
| DT - S | <i>Butyrivibrio</i>       | 0.265  | 0.259 |
| DT - S | <i>Campylobacter</i>      | 0.438  | 0.054 |
| DT - S | <i>Capnocytophaga</i>     | 0.626  | 0.003 |
| DT - S | <i>Cardiobacterium</i>    | 0.397  | 0.083 |
| DT - S | <i>Catonella</i>          | 0.725  | 0.000 |
| DT - S | <i>Corynebacterium</i>    | 0.785  | 0.000 |
| DT - S | <i>Dialister</i>          | 0.644  | 0.002 |
| DT - S | <i>Eikenella</i>          | 0.453  | 0.045 |
| DT - S | <i>Enterococcus</i>       | -0.139 | 0.558 |
| DT - S | <i>Filifactor</i>         | 0.543  | 0.013 |
| DT - S | <i>Fusobacterium</i>      | 0.562  | 0.010 |
| DT - S | <i>Gemella</i>            | 0.821  | 0.000 |
| DT - S | <i>Granulicatella</i>     | 0.236  | 0.316 |
| DT - S | <i>Haemophilus</i>        | 0.257  | 0.274 |
| DT - S | <i>Halomonas</i>          | -0.053 | 0.826 |
| DT - S | <i>Kingella</i>           | 0.723  | 0.000 |
| DT - S | <i>Lactobacillus</i>      | 0.125  | 0.598 |
| DT - S | <i>Lautropia</i>          | 0.605  | 0.005 |
| DT - S | <i>Leptotrichia</i>       | 0.409  | 0.073 |
| DT - S | <i>Megasphaera</i>        | 0.349  | 0.131 |
| DT - S | <i>Mogibacterium</i>      | -0.111 | 0.642 |
| DT - S | <i>Moraxella</i>          | 0.453  | 0.045 |
| DT - S | <i>Moryella</i>           | 0.100  | 0.674 |
| DT - S | <i>Mycoplasma</i>         | 0.544  | 0.013 |
| DT - S | <i>Neisseria</i>          | 0.669  | 0.001 |
| DT - S | <i>Oribacterium</i>       | 0.136  | 0.567 |
| DT - S | <i>Paludibacter</i>       | 0.962  | 0.000 |
| DT - S | <i>Parvimonas</i>         | 0.528  | 0.017 |
| DT - S | <i>Peptococcus</i>        | 0.595  | 0.006 |
| DT - S | <i>Peptostreptococcus</i> | 0.476  | 0.034 |
| DT - S | <i>Porphyromonas</i>      | 0.087  | 0.715 |
| DT - S | <i>Prevotella</i>         | 0.421  | 0.064 |
| DT - S | <i>Propionivibrio</i>     | 0.592  | 0.006 |
| DT - S | <i>Rothia</i>             | 0.388  | 0.091 |

|        |                      |        |       |
|--------|----------------------|--------|-------|
| DT - S | <i>Schwartzia</i>    | -0.076 | 0.749 |
| DT - S | <i>Selenomonas</i>   | 0.886  | 0.000 |
| DT - S | <i>Streptococcus</i> | 0.471  | 0.036 |
| DT - S | <i>Tannerella</i>    | 0.666  | 0.001 |
| DT - S | <i>TG5</i>           | 0.480  | 0.032 |
| DT - S | <i>Treponema</i>     | 0.847  | 0.000 |
| DT - S | <i>Veillonella</i>   | 0.420  | 0.066 |

---
