# Supplementary material for: Distinctions and associations between the microbiota of saliva and supragingival plaque of permanent and deciduous teeth
Source: PubMed Central journal article supplement (PMC6034885; doi:10.1371/journal.pone.0200337), 2018-07-06
Supplement: pone.0200337.s006.pdf [file pone.0200337.s006.pdf]

S5 Table.

| Groups  | Genera                    | $r_s$ | $P$     | Groups   | Genera                 | $r_s$ | $P$     |
|---------|---------------------------|-------|---------|----------|------------------------|-------|---------|
| PT - S* | <i>Actinomyces</i>        | 0.792 | < 0.001 | DT - S** | <i>Paludibacter</i>    | 0.962 | < 0.001 |
| PT - S  | <i>Corynebacterium</i>    | 0.783 | < 0.001 | DT - S   | <i>Selenomonas</i>     | 0.886 | < 0.001 |
| PT - S  | <i>Selenomonas</i>        | 0.763 | < 0.001 | DT - S   | <i>Treponema</i>       | 0.847 | < 0.001 |
| PT - S  | <i>Capnocytophaga</i>     | 0.761 | < 0.001 | DT - S   | <i>Gemella</i>         | 0.821 | < 0.001 |
| PT - S  | <i>Mycoplasma</i>         | 0.745 | < 0.001 | DT - S   | <i>Corynebacterium</i> | 0.785 | < 0.001 |
| PT - S  | <i>Fusobacterium</i>      | 0.722 | < 0.001 | DT - S   | <i>Blvii28</i>         | 0.725 | < 0.001 |
| PT - S  | <i>Moraxella</i>          | 0.720 | < 0.001 | DT - S   | <i>Catonella</i>       | 0.725 | < 0.001 |
| PT - S  | <i>Kingella</i>           | 0.705 | 0.001   | DT - S   | <i>Kingella</i>        | 0.723 | < 0.001 |
| PT - S  | <i>Treponema</i>          | 0.697 | 0.001   | DT - S   | <i>Abiotrophia</i>     | 0.681 | 0.001   |
| PT - S  | <i>Neisseria</i>          | 0.639 | 0.002   | DT - S   | <i>Neisseria</i>       | 0.669 | 0.001   |
| PT - S  | <i>Lautropia</i>          | 0.629 | 0.003   | DT - S   | <i>Tannerella</i>      | 0.666 | 0.001   |
| PT - S  | <i>Paludibacter</i>       | 0.614 | 0.004   | DT - S   | <i>Dialister</i>       | 0.644 | 0.002   |
| PT - S  | <i>Prevotella</i>         | 0.588 | 0.006   | DT - S   | <i>Capnocytophaga</i>  | 0.626 | 0.003   |
| PT - S  | <i>Gemella</i>            | 0.586 | 0.007   | DT - S   | <i>Lautropia</i>       | 0.605 | 0.005   |
| PT - S  | <i>Peptostreptococcus</i> | 0.542 | 0.013   | DT - S   | <i>Peptococcus</i>     | 0.595 | 0.006   |
| PT - S  | <i>Streptococcus</i>      | 0.532 | 0.016   | DT - S   | <i>Propionivibrio</i>  | 0.592 | 0.006   |
| PT - S  | <i>Abiotrophia</i>        | 0.531 | 0.016   | DT - S   | <i>Fusobacterium</i>   | 0.562 | 0.010   |
| PT - S  | <i>Anaerovorax</i>        | 0.530 | 0.016   | DT - S   | <i>Mycoplasma</i>      | 0.544 | 0.013   |
| PT - S  | <i>Megasphaera</i>        | 0.507 | 0.022   | DT - S   | <i>Filifactor</i>      | 0.543 | 0.013   |
| PT - S  | <i>Veillonella</i>        | 0.505 | 0.023   | DT - S   | <i>Parvimonas</i>      | 0.528 | 0.017   |
